# Supplementary material for: Phenotypically heterogeneous podoplanin-expressing cell populations are associated with the lymphatic vessel growth and fibrogenic responses in the acutely and chronically infarcted myocardium
Source: PubMed Central journal article supplement (PMC5363820; doi:10.1371/journal.pone.0173927), 2017-03-23

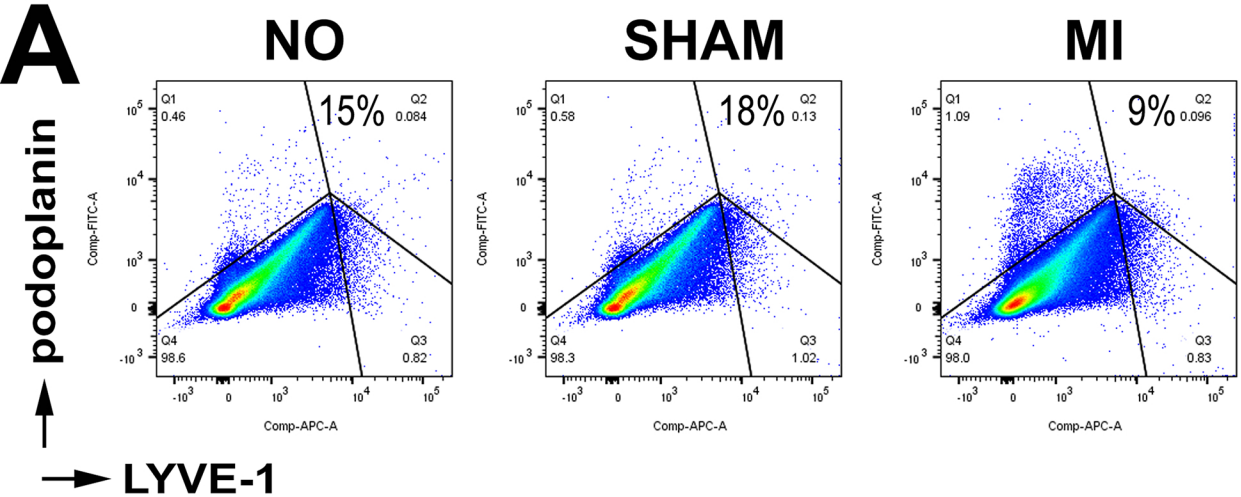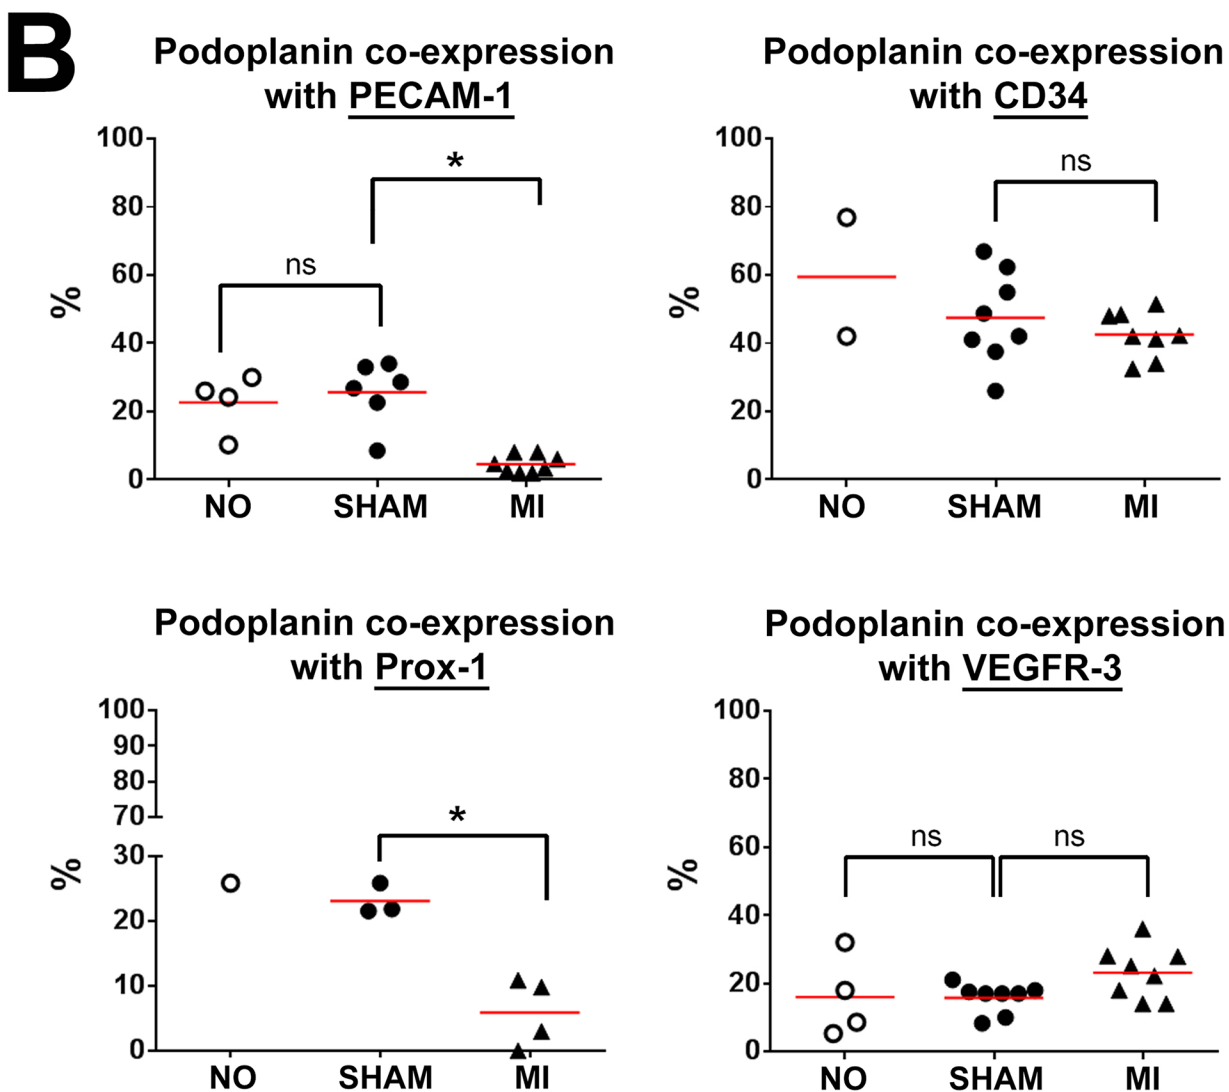

Supplement: pone.0173927.s004.pdf [file pone.0173927.s004.pdf]
